# Supplementary material
Source: publisher figshare collection journal article supplement (https://frontiersin.figshare.com/ndownloader/files/24191669)
Supplement: Supplementary file 1 [file 24191669]

Table S1 **Range, Avg, & SD of different environmental variables off Rushikulya Estuary**

|  | **PRM** | | | | | **MON** | | | | **POM** | | | |
| --- | --- | --- | --- | --- | --- | --- | --- | --- | --- | --- | --- | --- | --- |
|  | **MIN** | | **MAX** | **AVG** | **SD** | **MIN** | **MAX** | **AVG** | **SD** | **MIN** | **MAX** | **AVG** | **SD** |
| WT(0C) | | 26.35 | 28.9 | 27.47 | 0.6 | 25.75 | 28.59 | 27.03 | 0.74 | 25.25 | 27.99 | 26.46 | 0.76 |
| pH | | 7.72 | 8.29 | 8.13 | 0.13 | 7.68 | 8.43 | 8.22 | 0.18 | 7.86 | 8.42 | 8.16 | 0.14 |
| DO(mg/l) | | 6.36 | 8.05 | 7.29 | 0.44 | 5.96 | 8.17 | 7.16 | 0.54 | 6.18 | 8.3 | 7.12 | 0.55 |
| Salinity | | 30.12 | 35.63 | 33.41 | 1.71 | 28.24 | 35.55 | 32.87 | 2.06 | 28.36 | 35.28 | 32.84 | 1.99 |
| TSM(mg/l) | | 6.89 | 14.03 | 9.11 | 1.64 | 7.36 | 13.86 | 9.61 | 1.63 | 3.92 | 9.62 | 5.59 | 1.59 |
| NO3(mol/l) | | 1.02 | 2.09 | 1.47 | 0.25 | 0.89 | 1.46 | 1.13 | 0.15 | 1.19 | 3.62 | 2.12 | 0.76 |
| NO2(mol/l) | | 0.28 | 0.57 | 0.4 | 0.07 | 0.34 | 0.56 | 0.44 | 0.06 | 0.46 | 0.77 | 0.6 | 0.07 |
| NH4(mol/l) | | 1.36 | 6.31 | 2.17 | 1.08 | 3.67 | 6.81 | 5.08 | 0.9 | 2.09 | 6.69 | 3.71 | 1.31 |
| PO4(mol/l) | | 0.85 | 1.77 | 1.17 | 0.27 | 0.66 | 1.52 | 0.99 | 0.23 | 0.93 | 3.45 | 1.51 | 0.56 |
| SiO4(mol/l) | | 0.89 | 2.69 | 1.35 | 0.37 | 2.63 | 7.97 | 5.13 | 1.36 | 2.67 | 5.54 | 3.74 | 0.89 |
| Chl-*a*(mg/m3) | | 0.25 | 3.72 | 1.35 | 0.78 | 0.41 | 2.27 | 1 | 0.53 | 0.65 | 1.9 | 1.28 | 0.32 |

Min: Minimum, Max: Maximum, Avg.: Average, SD: Standard error of deviation
